# Supplementary material for: Klebsiella pneumonia in Sudan: Multidrug Resistance, Polyclonal Dissemination, and Virulence
Source: MDPI journal article supplement (doi:10.3390/antibiotics12020233), 2023-01-21
Supplement: s1 [file s1]

**Table S1.** Sequence types, antimicrobial susceptibility and associated resistome

| ST     | Sample name | AST phenotype | AGM R                                  | Flq R        | MLS R       | PheR         | Sul R       | Tet R         | Tmt R         | bla R                | ESBL     | bla Carb R | Intrinsic $\beta$ -lactamase | OmpK carbapenem R                                                            |
|--------|-------------|---------------|----------------------------------------|--------------|-------------|--------------|-------------|---------------|---------------|----------------------|----------|------------|------------------------------|------------------------------------------------------------------------------|
| ST101  | HishK5      | MDR, CR       | <i>aac(3)-IIa; aadA; strA;strB</i>     | <i>qnrS1</i> | -           | <i>catII</i> | <i>sul2</i> | -             | <i>dfrA14</i> | <i>OXA-1; TEM-1D</i> | CTX-M-15 | NDM-1      | SHV-1                        | -                                                                            |
|        | HishK7      | MDR-CR        | <i>aac(3)-IIa; strA;strB</i>           | -            | -           | <i>catII</i> | <i>sul2</i> | <i>tet(D)</i> | <i>dfrA14</i> | TEM-1D               | CTX-M-15 | -          | SHV-1                        | ompK35 substitution (G947A). Premature stop codon at amino acid position 316 |
|        | K11         | MDR           | <i>aac(3)-IIa; strA;strB</i>           | -            | -           | <i>catII</i> | <i>sul2</i> | <i>tet(D)</i> | <i>dfrA14</i> | TEM-1D               | CTX-M-15 | -          | SHV-1                        |                                                                              |
|        | K12         | MDR           | <i>aac(3)-IIa; strA;strB</i>           | -            | -           | <i>catII</i> | <i>sul2</i> | <i>tet(D)</i> | <i>dfrA14</i> | TEM-1D               | CTX-M-15 | -          | SHV-1                        |                                                                              |
|        | K5          | MDR           | <i>aac(3)-IIa; strA;strB</i>           | -            | -           | <i>catII</i> | <i>sul2</i> | <i>tet(D)</i> | <i>dfrA14</i> | TEM-1D               | CTX-M-15 | -          | SHV-1                        |                                                                              |
|        | K9          | MDR           | <i>aac(3)-IIa; strA;strB</i>           | -            | -           | <i>catII</i> | <i>sul2</i> | <i>tet(D)</i> | <i>dfrA14</i> | TEM-1D               | CTX-M-15 | -          | SHV-1                        |                                                                              |
| ST11   | LH_F139     | MDR, CR       | <i>aac(6')-Ib; aadA2; aph3-Ia;rmtF</i> | <i>qnrB1</i> | <i>mphA</i> | -            | <i>sul1</i> | -             | <i>dfrA12</i> | -                    | CTX-M-15 | NDM-4      | SHV-11                       | -                                                                            |
| ST1198 | LH_F137     | S             | -                                      | -            | -           | -            | -           | -             | -             | -                    | -        | -          | SHV-11                       | -                                                                            |
| ST13   | LH_R290     | MDR           | <i>aac(3)-IIa</i>                      | -            | -           | -            | -           | -             | -             | SCO-1; TEM-1D        | CTX-M-15 | -          | SHV-1                        | -                                                                            |
| ST1447 | LH_F68      | S             | -                                      | -            | -           | -            | -           | -             | -             | -                    | -        | -          | SHV-27                       | -                                                                            |
| ST147  | K13         | MDR           | <i>aac(3)-IIa</i>                      | -            | -           | -            | -           | -             | -             | SCO-1                | CTX-M-15 | -          | SHV-11                       |                                                                              |

|      |         |         |                                                                             |              |                                               |                                |                              |                                  |               |                            |          |       |        |                                    |
|------|---------|---------|-----------------------------------------------------------------------------|--------------|-----------------------------------------------|--------------------------------|------------------------------|----------------------------------|---------------|----------------------------|----------|-------|--------|------------------------------------|
|      | K3      | MDR     | <i>aac(3)-IIa</i>                                                           | -            | -                                             | -                              | -                            | -                                | -             | SCO-1                      | CTX-M-15 | -     | SHV-11 |                                    |
|      | LH_R289 | MDR, CR | <i>aac(6')-Ib-cr</i> ;<br><i>aph(3')-VI</i>                                 | <i>qnrS1</i> | -                                             | <i>catB3</i>                   | <i>sul1</i>                  | -                                | -             | OXA-1                      | CTX-M-15 | NDM-1 | SHV-11 |                                    |
|      | LH_R344 | MDR, CR | <i>aac(6')-Ib'</i> ;<br><i>aadA</i> ;<br><i>aph(3')-VI</i> ;<br><i>armA</i> | <i>qnrS1</i> | <i>mphA</i> ;<br><i>mphE</i> ;<br><i>msrE</i> | -                              | <i>sul1</i> ;<br><i>sul2</i> | -                                | <i>dfrA5</i>  | OXA-9;<br>TEM-1D           | CTX-M-15 | NDM-5 | SHV-11 |                                    |
|      | LH_F18  | MDR, CR | <i>aac(6')-Ib-cr</i> ;<br><i>aph(3')-VI</i>                                 | <i>qnrS1</i> | -                                             | <i>catB3</i>                   | <i>sul1</i>                  | -                                | -             | OXA-1                      | CTX-M-15 | NDM-1 | SHV-11 |                                    |
|      | LH_F97  | MDR     | <i>aac(6')-Ib'</i> ;<br><i>aad</i>                                          | -            | -                                             | -                              | -                            | -                                | -             | OXA-9;<br>TEM-1D           | -        | -     | SHV-11 |                                    |
|      | LH_F134 | MDR, CR | <i>aadA2</i> ;<br><i>aph(3')-VI</i> ;<br><i>strA</i> ; <i>strB</i>          | -            | <i>mphA</i>                                   | <i>catII</i>                   | <i>sul1</i>                  | -                                | <i>dfrA12</i> | -                          | CTX-M-15 | NDM-1 | SHV-11 |                                    |
|      | LH_R387 | MDR, CR | <i>aadA</i> ;<br><i>aph(3')-VI</i>                                          | <i>qnrS1</i> | <i>mphA</i>                                   | <i>catB3</i>                   | <i>sul1</i>                  | -                                | -             | OXA-1;<br>OXA-9;<br>TEM-1D | CTX-M-15 | NDM-1 | SHV-11 |                                    |
|      | LH_F149 | MDR, CR | <i>aadA</i> ;<br><i>aph(3')-VI</i>                                          | <i>qnrS1</i> | <i>mphA</i>                                   | <i>catB3</i>                   | <i>sul1</i>                  | -                                | -             | OXA-1;<br>OXA-9;<br>TEM-1D | CTX-M-15 | NDM-1 | SHV-11 |                                    |
| ST15 | HishK3  | MDR     | <i>aac(3)-IIa</i> ;<br><i>aac(6')-Ib-cr</i>                                 | -            | -                                             | <i>catB4</i> ;<br><i>catA1</i> | <i>sul1</i>                  | -                                | -             | CMY-4;<br>OXA-1            | CTX-M-15 | -     | SHV-28 | -                                  |
|      | HishK4  | MDR     | -                                                                           | -            | -                                             | -                              | -                            | -                                | -             | CMY-4                      | -        | -     | SHV-28 | -                                  |
|      | K8      | MDR     | <i>aac(3)-IIa</i> ;<br><i>aac(6')-Ib-cr</i>                                 | -            | -                                             | <i>catA1</i>                   | <i>sul1</i>                  | -                                | -             | CMY-4                      | CTX-M-15 | -     | SHV-28 | -                                  |
|      | LH_F104 | MDR     | <i>aadA1</i>                                                                | -            | -                                             | -                              | <i>sul1</i>                  | <i>tet(A)</i>                    | <i>dfrA1</i>  | TEM-1D                     | CTX-M-15 | -     | SHV-28 | -                                  |
|      | LH_F122 | MDR     | <i>aadA1</i>                                                                | -            | -                                             | -                              | <i>sul1</i>                  | <i>tet(A)</i>                    | <i>dfrA1</i>  | TEM-1D                     | CTX-M-15 | -     | SHV-28 | -                                  |
|      | LH_F164 | MDR, CR | <i>aac(3)-IIa</i> ;<br><i>aac(6')-Ib-cr</i> ;                               | <i>qnrS1</i> | <i>mphA</i>                                   | <i>catB4</i> ;<br><i>catA1</i> | <i>sul2</i>                  | <i>tet(A)</i> ;<br><i>tet(D)</i> | <i>dfrA14</i> | OXA-1                      | CTX-M-15 | -     | SHV-28 | OmpK35<br>substitution<br>(G690A). |

|      |         |         |                                                                                              |              |             |                               |             |               |               |               |                 |              |                |                                                       |
|------|---------|---------|----------------------------------------------------------------------------------------------|--------------|-------------|-------------------------------|-------------|---------------|---------------|---------------|-----------------|--------------|----------------|-------------------------------------------------------|
|      |         |         | <i>aph(3')-VI;</i><br><i>strA;strB</i>                                                       |              |             |                               |             |               |               |               |                 |              |                | Premature stop<br>codon at amino<br>acid position 230 |
| ST17 | HishK11 | MDR     | -                                                                                            | -            | -           | <i>catA1</i>                  | -           | <i>tet(D)</i> | -             | <i>TEM-1D</i> | -               | -            | <i>SHV-11</i>  | -                                                     |
|      | HishK12 | MDR, CR | <i>aac(3)-IIa;</i><br><i>aac(6')-Ib-</i><br><i>cr;</i><br><i>aadA5</i>                       | <i>qnrS1</i> | <i>mphA</i> | <i>catB4;</i><br><i>catA1</i> | <i>sul1</i> | <i>tet(D)</i> | <i>dfrA17</i> | <i>OXA-1</i>  | <i>CTX-M-15</i> | <i>NDM-1</i> | <i>SHV-11</i>  | -                                                     |
|      | HishK13 | MDR     | -                                                                                            | -            | -           | <i>catA1</i>                  | -           | <i>tet(D)</i> | -             | <i>TEM-1D</i> | -               | -            | <i>SHV-11</i>  | -                                                     |
|      | LH_R223 | MDR     | <i>strA;strB</i>                                                                             | -            | -           | -                             | <i>sul2</i> | -             | -             | <i>TEM-1D</i> | <i>CTX-M-15</i> | -            | <i>SHV-11</i>  | -                                                     |
| ST20 | HishK10 | MDR     | -                                                                                            | <i>qnrS1</i> | -           | -                             | -           | -             | <i>dfrA14</i> | -             | <i>CTX-M-15</i> | -            | <i>SHV-187</i> | -                                                     |
|      | K10     | MDR, CR | <i>aac(3)-IIa;</i><br><i>aac(6')-Ib-</i><br><i>cr;</i><br><i>aadA5;</i><br><i>aph(3')-VI</i> | <i>qnrS1</i> | <i>mphA</i> | <i>catB0</i>                  | <i>sul1</i> | -             | <i>dfrA17</i> | <i>OXA-1</i>  | <i>CTX-M-15</i> | <i>NDM-1</i> | <i>SHV-187</i> | -                                                     |
|      | HishK14 | MDR, CR | <i>aac(3)-IIa;</i><br><i>aac(6')-Ib-</i><br><i>cr;</i><br><i>aadA5;</i><br><i>aph(3')-VI</i> | <i>qnrS1</i> | <i>mphA</i> | <i>catB1</i>                  | <i>sul1</i> | -             | <i>dfrA17</i> | <i>OXA-1</i>  | <i>CTX-M-15</i> | <i>NDM-1</i> | <i>SHV-187</i> | -                                                     |
|      | K15     | MDR, CR | <i>aac(3)-IIa;</i><br><i>aac(6')-Ib-</i><br><i>cr;</i><br><i>aadA5</i>                       | <i>qnrS1</i> | <i>mphA</i> | <i>catB2</i>                  | <i>sul1</i> | -             | <i>dfrA17</i> | -             | <i>CTX-M-15</i> | <i>NDM-1</i> | <i>SHV-187</i> | -                                                     |
|      | K2      | MDR, CR | <i>aac(3)-IIa;</i><br><i>aac(6')-Ib-</i><br><i>cr;</i><br><i>aadA5;</i><br><i>aph(3')-VI</i> | <i>qnrS1</i> | <i>mphA</i> | <i>catB3</i>                  | <i>sul1</i> | -             | <i>dfrA17</i> | <i>OXA-1</i>  | <i>CTX-M-15</i> | <i>NDM-1</i> | <i>SHV-187</i> | -                                                     |
|      | K6      | MDR, CR | <i>aac(3)-IIa;</i><br><i>aac(6')-Ib-</i>                                                     | <i>qnrS1</i> | <i>mphA</i> | <i>catB4</i>                  | <i>sul1</i> | -             | <i>dfrA17</i> | <i>OXA-1</i>  | <i>CTX-M-15</i> | <i>NDM-1</i> | <i>SHV-187</i> | -                                                     |

|           |          |                               |                                                                                             |                               |                             |              |                             |               |                                 |                  |          |             |         |   |
|-----------|----------|-------------------------------|---------------------------------------------------------------------------------------------|-------------------------------|-----------------------------|--------------|-----------------------------|---------------|---------------------------------|------------------|----------|-------------|---------|---|
|           |          |                               | <i>cr;</i><br><i>aadA5;</i><br><i>aph(3')-VI</i>                                            |                               |                             |              |                             |               |                                 |                  |          |             |         |   |
|           | LH_R164  | MDR                           | -                                                                                           | <i>qnrS1</i>                  | -                           | -            | -                           | <i>tet(D)</i> | -                               | -                | CTX-M-15 | -           | SHV-187 | - |
| ST218-3LV | LH_R154  | S                             | -                                                                                           | -                             | -                           | -            | -                           | -             | -                               | -                | -        | -           | SHV-93  | - |
| ST219     | LH_F64   | MDR                           | <i>strA;strB</i>                                                                            | <i>qnrB4;</i><br><i>qnrS1</i> | <i>mphA</i>                 | -            | <i>sul1;s</i><br><i>ul2</i> | <i>tet(A)</i> | <i>dfrA14;d</i><br><i>frA17</i> | DHA-1;<br>TEM-1D | CTX-M-15 | -           | SHV-1   | - |
|           | LH_F66   | MDR                           | <i>strA;strB</i>                                                                            | <i>qnrB4;</i><br><i>qnrS1</i> | <i>mphA</i>                 | -            | <i>sul1;s</i><br><i>ul2</i> | <i>tet(A)</i> | <i>dfrA14;d</i><br><i>frA17</i> | DHA-1;<br>TEM-1D | CTX-M-15 | -           | SHV-1   | - |
| ST231     | LH_R92   | MDR, CR                       | <i>aac(6')-Ib;</i><br><i>aadA2;</i><br><i>rmtF</i>                                          | <i>qnrS1</i>                  | <i>ermB;</i><br><i>mphA</i> | -            | <i>sul1</i>                 | -             | <i>dfrA12</i>                   | TEM-1D           | CTX-M-15 | OXA-<br>232 | SHV-1   |   |
|           | LH_R219  | MDR                           | -                                                                                           | <i>qnrS1</i>                  | -                           | <i>catA1</i> | -                           | -             | -                               | TEM-1D           | -        | -           | SHV-1   |   |
| ST237     | LH_R208  | S                             | -                                                                                           | -                             | -                           | -            | -                           | -             | -                               | -                | -        | -           | SHV-11  | - |
|           | LH_F281  | S                             | -                                                                                           | -                             | -                           | -            | -                           | -             | -                               | -                | -        | -           | SHV-11  | - |
| ST24-1LV  | LH_F2    | S                             | -                                                                                           | -                             | -                           | -            | -                           | -             | -                               | -                | -        | -           | SHV-11  | - |
| ST2459    | LH_F25   | β-lactam<br>resistant<br>only | -                                                                                           | -                             | -                           | -            | -                           | -             | -                               | -                | CTX-M-15 | -           | SHV-1   | - |
| ST2674    | LH_S25   | MDR, CR                       | <i>aac(3)-IIa;</i><br><i>aac(6')-Ib-</i><br><i>cr;</i><br><i>aadA;</i><br><i>aph(3')-VI</i> | <i>qnrS1</i>                  | -                           | <i>catB4</i> | <i>sul1</i>                 | -             | <i>dfrA15</i>                   | -                | CTX-M-15 | NDM-1       | SHV-11  | - |
| ST2735    | LH_F50_1 | MDR                           | <i>strA;strB</i>                                                                            | <i>qnrB4</i>                  | -                           | -            | <i>sul1</i>                 | -             | -                               | DHA-1            | -        | -           | SHV-11  | - |
| ST29-1LV  | LH_R314  | MDR                           | -                                                                                           | -                             | -                           | <i>catA1</i> | -                           | -             | <i>dfrA15</i>                   | TEM-1D           | CTX-M-15 | -           | -       | - |
| ST292     | LH_F82   | MDR                           | <i>strA;strB</i>                                                                            | -                             | -                           | <i>catII</i> | <i>sul2</i>                 | -             | <i>dfrA14</i>                   | TEM-1D           | CTX-M-15 | -           | SHV-11  | - |
| ST307     | LH_R146  | MDR, CR                       | <i>aac(3)-IIa;</i><br><i>aadA;</i>                                                          | <i>qnrS1</i>                  | -                           | <i>catB1</i> | <i>sul2</i>                 | -             | <i>dfrA14</i>                   | OXA-1;<br>TEM-1  | CTX-M-15 | NDM-1       | SHV-28  |   |

|        |         |         |                                                                                       |                               |                                             |              |                  |               |                      |                  |                       |                  |        |   |
|--------|---------|---------|---------------------------------------------------------------------------------------|-------------------------------|---------------------------------------------|--------------|------------------|---------------|----------------------|------------------|-----------------------|------------------|--------|---|
|        |         |         | <i>aph(3')-VI;</i><br><i>strA;strB</i>                                                |                               |                                             |              |                  |               |                      |                  |                       |                  |        |   |
|        | LH_R167 | MDR, CR | <i>aac(3)-IIa;</i><br><i>aph(3')-VI;</i><br><i>strA;strB</i>                          | <i>qnrS1</i>                  | -                                           | <i>catB2</i> | <i>sul1;sul2</i> | -             | <i>dfrA14;dfrA15</i> | OXA-1;<br>TEM-1  | CTX-M-15              | NDM-1            | SHV-28 |   |
|        | LH_R182 | MDR, CR | <i>aac(6')-Ib-cr;</i><br><i>aadA5;</i><br><i>aph(3')-VI;</i><br><i>strA;strB</i>      | <i>qnrB1;</i><br><i>qnrS1</i> | <i>mphA</i>                                 | <i>catB3</i> | <i>sul1;sul2</i> | <i>tet(A)</i> | <i>dfrA14;dfrA17</i> | OXA-1            | CTX-M-15              | NDM-1            | SHV-28 |   |
|        | LH_R174 | MDR, CR | <i>aac(3)-IIa;</i><br><i>aadA;</i><br><i>aph(3')-VI;</i><br><i>strA;strB</i>          | <i>qnrS1</i>                  | -                                           | <i>catB4</i> | <i>sul2</i>      | -             | <i>dfrA14</i>        | OXA-1;<br>TEM-1  | CTX-M-15              | NDM-1            | SHV-28 |   |
|        | LH_R275 | MDR     | -                                                                                     | -                             | -                                           | -            | -                | -             | <i>dfrA14</i>        | -                | CTX-M-15              | -                | SHV-28 |   |
|        | LH_F175 | MDR     | <i>aac(3)-IIa;</i><br><i>aac(6')-Ib-cr;</i><br><i>strA;strB</i>                       | -                             | -                                           | <i>catB4</i> | <i>sul2</i>      | -             | <i>dfrA14</i>        | OXA-1;<br>TEM-1D | CTX-M-15              | -                | SHV-28 |   |
| ST3161 | LH_F86  | S       | -                                                                                     | -                             | -                                           | -            | -                | -             | -                    | -                | -                     | -                | SHV-11 | - |
| ST3430 | LH_R195 | MDR     | <i>aadA2;</i><br><i>aph3-Ia;</i><br><i>strA;strB</i>                                  | <i>qnrS1</i>                  | <i>mphA</i>                                 | -            | <i>sul1;sul2</i> | <i>tet(A)</i> | <i>dfrA12</i>        | -                | CTX-M-15              | -                | SHV-77 | - |
| ST38   | LH_F158 | MDR, CR | <i>aadA;</i><br><i>aadA2;</i><br><i>aph(3')-VI;</i><br><i>strA;strB</i>               | <i>qnrS1</i>                  | <i>mphA</i>                                 | <i>catB4</i> | <i>sul1;sul2</i> | -             | <i>dfrA12;dfrA14</i> | OXA-1            | CTX-M-15              | NDM-1            | SHV-11 |   |
| ST383  | HishK8  | MDR, CR | <i>aac(6')-Ib';</i><br><i>aadA;</i><br><i>aph3-Ia;</i><br><i>armA;</i><br><i>strA</i> | <i>qnrS1</i>                  | <i>mphA;</i><br><i>mphE;</i><br><i>msrE</i> | -            | <i>sul1;sul2</i> | <i>tet(A)</i> | <i>dfrA5</i>         | TEM-1            | CTX-M-14;<br>CTX-M-15 | NDM-5;<br>OXA-48 | SHV-1  |   |

|       |         |         |                                                                                          |              |                                               |              |                              |               |               |        |                       |                  |        |   |
|-------|---------|---------|------------------------------------------------------------------------------------------|--------------|-----------------------------------------------|--------------|------------------------------|---------------|---------------|--------|-----------------------|------------------|--------|---|
|       | HishK9  | MDR, CR | <i>aac(6')-Ib'</i> ;<br><i>aadA</i> ;<br><i>aph3-Ia</i> ;<br><i>strA</i>                 | <i>qnrS1</i> | <i>mphA</i> ;<br><i>mphE</i>                  | -            | <i>sul1</i> ;<br><i>sul2</i> | <i>tet(A)</i> | <i>dfrA5</i>  | TEM-1  | CTX-M-14;<br>CTX-M-15 | NDM-5;<br>OXA-48 | SHV-1  |   |
|       | LH_F15  | MDR, CR | <i>aph3-Ia</i> ;<br><i>strA</i> ;<br><i>strB</i>                                         | -            | <i>mphA</i>                                   | <i>catA1</i> | <i>sul2</i>                  | <i>tet(A)</i> | -             | -      | CTX-M-14              | OXA-48           | SHV-1  |   |
|       | LH_F35  | MDR, CR | <i>aac(6')-Ib'</i> ;<br><i>aadA</i> ;<br><i>aph(3')-VI</i>                               | <i>qnrS1</i> | -                                             | -            | -                            | -             | -             | TEM-1  | CTX-M-15              | NDM-5            | SHV-1  |   |
|       | LH_F190 | MDR, CR | <i>aph(3')-VI</i> ;<br><i>aph3-Ia</i> ;<br><i>armA</i> ;<br><i>strA</i> ;<br><i>strB</i> | <i>qnrS1</i> | <i>mphA</i> ;<br><i>mphE</i> ;<br><i>msrE</i> | -            | <i>sul1</i> ;<br><i>sul2</i> | <i>tet(A)</i> | <i>dfrA5</i>  | -      | CTX-M-14;<br>CTX-M-15 | NDM-5;<br>OXA-48 | SHV-1  | - |
| ST39  | LH_F146 | S       | -                                                                                        | -            | -                                             | -            | -                            | -             | -             | -      | -                     | -                | SHV-1  | - |
| ST437 | K4      | MDR, CR | <i>aac(3)-IIId</i> ;<br><i>aac(6')-Ib'</i> ;<br><i>aadA</i> ;<br><i>aph(3')-VI</i>       | <i>qnrS1</i> | -                                             | -            | -                            | -             | -             | TEM-1  | CTX-M-15              | NDM-1            | SHV-11 | - |
|       | LH_R323 | MDR, CR | <i>rmtB</i>                                                                              | -            | <i>ermB</i> ;<br><i>mphA</i>                  | -            | <i>sul1</i>                  | -             | <i>dfrA30</i> | TEM-1D | CTX-M-15              | NDM-5            | SHV-11 |   |
|       | LH_F101 | MDR, CR | <i>rmtB</i>                                                                              | -            | <i>ermB</i> ;<br><i>mphA</i>                  | -            | <i>sul1</i>                  | -             | <i>dfrA30</i> | TEM-1D | CTX-M-15              | NDM-5            | SHV-11 |   |
|       | LH_F102 | MDR, CR | <i>rmtB</i>                                                                              | -            | <i>ermB</i> ;<br><i>mphA</i>                  | -            | <i>sul1</i>                  | -             | <i>dfrA30</i> | TEM-1D | CTX-M-15              | NDM-5            | SHV-11 |   |
|       | LH_F143 | MDR, CR | <i>rmtB</i>                                                                              | -            | <i>mphA</i>                                   | -            | <i>sul1</i>                  | -             | <i>dfrA30</i> | TEM-1D | CTX-M-15              | NDM-5            | SHV-11 |   |
|       | LH_F169 | MDR, CR | <i>rmtB</i>                                                                              | -            | <i>ermB</i> ;<br><i>mphA</i>                  | -            | <i>sul1</i>                  | -             | <i>dfrA30</i> | TEM-1D | CTX-M-15              | NDM-5            | SHV-11 |   |
|       | LH_F176 | MDR, CR | <i>rmtB</i>                                                                              | -            | <i>ermB</i> ;<br><i>mphA</i>                  | -            | <i>sul1</i>                  | -             | <i>dfrA30</i> | TEM-1D | CTX-M-15              | NDM-5            | SHV-11 |   |

|              |         |                         |                                              |              |             |              |                   |                       |               |               |          |       |         |                                               |
|--------------|---------|-------------------------|----------------------------------------------|--------------|-------------|--------------|-------------------|-----------------------|---------------|---------------|----------|-------|---------|-----------------------------------------------|
| <b>ST45</b>  | LH_R313 | MDR-CR                  | <i>strA;strB</i>                             | <i>qnrS1</i> | -           | -            | <i>sul2</i>       | -                     | <i>dfrA14</i> | TEM-190       | CTX-M-15 | -     | SHV-1   | ompK36 variant. LSP insertion at position 184 |
| <b>ST469</b> | LH_F126 | MDR                     | <i>aph3-Ia; strA;strB</i>                    | <i>qnrS1</i> | <i>mphA</i> | <i>catII</i> | <i>sul1; sul2</i> | <i>tet(A)</i>         | <i>dfrA12</i> | -             | CTX-M-15 | -     | SHV-11  | -                                             |
| <b>ST474</b> | LH_R384 | MDR                     | <i>strA;strB</i>                             | <i>qnrB1</i> | -           | -            | <i>sul2</i>       | -                     | <i>dfrA14</i> | TEM-1D        | CTX-M-15 | -     | SHV-11  | -                                             |
| <b>ST501</b> | LH_F174 | MDR                     | -                                            | <i>qnrS1</i> | -           | -            | -                 | -                     | <i>dfrA14</i> | -             | CTX-M-15 | -     | SHV-11  | -                                             |
| <b>ST514</b> | LH_R120 | β-lactam resistant only | -                                            | -            | -           | -            | -                 | -                     | -             | -             | CTX-M-15 | -     | SHV-63  | -                                             |
| <b>ST530</b> | HishK1  | MDR, CR                 | <i>aac(3)-IIa; aac(6')-Ib-cr; aph(3')-VI</i> | <i>qnrS1</i> | -           | <i>catB4</i> | <i>sul2</i>       | <i>tet(A); tet(D)</i> | <i>dfrA30</i> | OXA-1         | CTX-M-15 | NDM-1 | -       | -                                             |
|              | HishK2  | MDR, CR                 | <i>aac(3)-IIa; aac(6')-Ib-cr</i>             | <i>qnrS1</i> | -           | <i>catB4</i> | <i>sul2</i>       | <i>tet(A); tet(D)</i> | <i>dfrA30</i> | OXA-1         | CTX-M-15 | NDM-1 | -       | -                                             |
| <b>ST664</b> | LH_R100 | MDR, CR                 | <i>aac(3)-IIa; aadA</i>                      | <i>qnrS1</i> | -           | -            | <i>sul1</i>       | -                     | <i>dfrA15</i> | -             | CTX-M-15 | NDM-1 | SHV-11  | -                                             |
|              | LH_R107 | MDR, CR                 | <i>aac(3)-IIa; aadA</i>                      | <i>qnrS1</i> | -           | -            | <i>sul1</i>       | -                     | <i>dfrA15</i> | -             | CTX-M-15 | NDM-1 | SHV-11  | -                                             |
| <b>ST882</b> | LH_R162 | S                       | -                                            | -            | -           | -            | -                 | -                     | -             | -             | -        | -     | SHV-101 | -                                             |
|              | LH_F192 | S                       | -                                            | -            | -           | -            | -                 | -                     | -             | -             | -        | -     | SHV-101 | -                                             |
| <b>ST901</b> | LH_F159 | MDR                     | <i>aac(6')-Ib-cr; aadA; strA;strB</i>        | <i>qnrS1</i> | -           | <i>catB4</i> | <i>sul1</i>       | -                     | <i>dfrA15</i> | OXA-1; TEM-1D | CTX-M-15 | -     | SHV-1   | -                                             |

ST: sequence type; AST: antimicrobial susceptibility test; AGly: aminoglycoside; R: resistance; Flq: Fluoroquinolone; MLS: Macrolide; Phe: Chloramphenicol; Sul: sulphonamide; Tet: tetracycline; Tmt: trimethoprim; Bla: β-lactamase; ESBL: extended-spectrum β lactamase; Carb: carbapenemase; OmpK: outer-membrane porin substitutions contributing to carbapenem resistance; MDR: multidrug resistance; CR: carbapenem resistant; S: Susceptible to all tested antibiotics.

OmpK35 and ompK36 sequences were analysed using Geneious Prime. OmpK35 Accession no KX528047.1 was used as a reference for OmpK35 sequence analysis. Reference laboratory strain ATCC43816 (Accession no CP009208.1), and amino acid sequences 6CRCP and 6CRD3 on Protein Data Bank (PDB) [10.2210/pdb6rcp/pdb](https://doi.org/10.2210/pdb6rcp/pdb) [15] were used as references for OmpK36 sequence analysis.
