# Supplementary material for: Klebsiella pneumonia in Sudan: Multidrug Resistance, Polyclonal Dissemination, and Virulence
Source: MDPI journal article supplement (doi:10.3390/antibiotics12020233), 2023-01-21
Supplement: s1 [file s1]

**Table S2:** Details of ST with virulence genes, K and O loci

| ST     | Sample name | Yersiniabactin | Aerobactin | RmpADC | K_locus                         | O_locus |
|--------|-------------|----------------|------------|--------|---------------------------------|---------|
| ST101  | HishK5      | ybt 9; ICEKp3  | -          | -      | unknown<br>(best match = KL107) | O1v1    |
|        | HishK7      | ybt 9; ICEKp3  | -          | -      | unknown<br>(best match = KL107) | O1v1    |
|        | K11         | ybt 9; ICEKp3  | -          | -      | unknown<br>(best match = KL17)  | O1v1    |
|        | K12         | ybt 9; ICEKp3  | -          | -      | unknown<br>(best match = KL17)  | O1v1    |
|        | K5          | ybt 9; ICEKp3  | -          | -      | KL17                            | O1v1    |
|        | K9          | ybt 9; ICEKp3  | -          | -      | unknown<br>(best match = KL107) | O1/O2v1 |
| ST11   | LH_F139     | ybt 9; ICEKp3  | -          | -      | KL15                            | O4      |
| ST1198 | LH_F137     | -              | -          | -      | KL3                             | O2v2    |
| ST13   | LH_R290     | -              | -          | -      | KL3                             | O1v2    |
| ST1447 | LH_F68      | -              | -          | -      | KL115                           | O3b     |
| ST147  | K13         | -              | -          | -      | unknown<br>(best match = KL10)  | O3/O3a  |
|        | K3          | -              | -          | -      | KL10                            | O3/O3a  |
|        | LH_R289     | ybt 9; ICEKp3  | -          | -      | KL64                            | O2v1    |
|        | LH_R344     | ybt 9; ICEKp3  | -          | -      | KL64                            | O2v1    |
|        | LH_F18      | ybt 9; ICEKp3  | -          | -      | KL64                            | O2v1    |
|        | LH_F97      | ybt 9; ICEKp3  | -          | -      | KL64                            | O2v1    |
|        | LH_F134     | -              | -          | -      | KL10                            | O3/O3a  |
|        | LH_R387     | ybt 9; ICEKp3  | -          | -      | unknown<br>(best match = KL107) | OL101   |
|        | LH_F149     | ybt 9; ICEKp3  | -          | -      | unknown<br>(best match = KL107) | OL101   |

|      |         |               |   |   |                                       |                                         |
|------|---------|---------------|---|---|---------------------------------------|-----------------------------------------|
| ST15 | HishK3  | -             | - | - | unknown<br>(best<br>match =<br>KL48)  | O1v1                                    |
|      | HishK4  | -             | - | - | unknown<br>(best<br>match =<br>KL50)  | unknown<br>(best<br>match =<br>O1/O2v1) |
|      | K8      | -             | - | - | unknown<br>(best<br>match =<br>KL107) | O1v1                                    |
|      | LH_F104 | -             | - | - | KL112                                 | O1v2                                    |
|      | LH_F122 | -             | - | - | KL112                                 | O1v2                                    |
|      | LH_F164 | ybt 9; ICEKp3 | - | - | KL24                                  | O1v1                                    |
| ST17 | HishK11 | -             | - | - | unknown<br>(best<br>match =<br>KL107) | unknown<br>(best<br>match =<br>O2v1)    |
|      | HishK12 | -             | - | - | unknown<br>(best<br>match =<br>KL122) | O2v2                                    |
|      | HishK13 | -             | - | - | unknown<br>(best<br>match =<br>KL122) | O2v2                                    |
|      | LH_R223 | -             | - | - | KL23                                  | O2v2                                    |
| ST20 | HishK10 | -             | - | - | unknown<br>(best<br>match =<br>KL28)  | O1v2                                    |
|      | K10     | -             | - | - | unknown<br>(best<br>match =<br>KL64)  | O1v1                                    |
|      | HishK14 | -             | - | - | unknown<br>(best<br>match =<br>KL64)  | O1v1                                    |
|      | K15     | -             | - | - | unknown<br>(best<br>match =<br>KL64)  | O1/O2v1                                 |
|      | K2      | -             | - | - | KL64                                  | O1v1                                    |
|      | K6      | -             | - | - | unknown<br>(best<br>match =<br>KL64)  | O1v1                                    |

|           |          |                   |                |                  |                                      |                                      |
|-----------|----------|-------------------|----------------|------------------|--------------------------------------|--------------------------------------|
|           | LH_R164  | -                 | -              | -                | KL28                                 | O1v2                                 |
| ST218-3LV | LH_R154  | -                 | -              | -                | KL112                                | O2v2                                 |
| ST219     | LH_F64   | -                 | -              | -                | KL114                                | O1v1                                 |
|           | LH_F66   | -                 | -              | -                | KL114                                | O1v1                                 |
| ST231     | LH_R92   | ybt 14;<br>ICEKp5 | iuc<br>unknown | -                | KL51                                 | O1v2                                 |
|           | LH_R219  | -                 | -              | -                | KL51                                 | O1v2                                 |
| ST237     | LH_R208  | -                 | -              | -                | KL21                                 | O2v1                                 |
|           | LH_F281  | -                 | -              | -                | KL21                                 | O2v1                                 |
| ST24-1LV  | LH_F2    | -                 | -              | -                | KL2                                  | O1/O2v2                              |
| ST2459    | LH_F25   | -                 | -              | -                | KL60                                 | O3b                                  |
| ST2674    | LH_S25   | -                 | -              | -                | KL110                                | O2v1                                 |
| ST2735    | LH_F50_1 | -                 | -              | -                | KL110                                | O1v1                                 |
| ST29-1LV  | LH_R314  | -                 | -              | -                | KL63                                 | O1v2                                 |
| ST292     | LH_F82   | -                 | -              | -                | KL50                                 | O3b                                  |
| ST307     | LH_R146  | ybt 10;<br>ICEKp4 | -              | -                | KL102                                | O2v2                                 |
|           | LH_R167  | ybt 10;<br>ICEKp4 | -              | -                | KL102                                | O2v2                                 |
|           | LH_R182  | -                 | -              | -                | KL102                                | O2v2                                 |
|           | LH_R174  | ybt 10;<br>ICEKp4 | -              | -                | KL102                                | O2v2                                 |
|           | LH_R275  | -                 | -              | -                | KL102                                | O2v2                                 |
|           | LH_F175  | -                 | -              | -                | KL102                                | O2v2                                 |
| ST3161    | LH_F86   | ybt 10;<br>ICEKp4 | -              | -                | KL55                                 | O3/O3a                               |
| ST3430    | LH_R195  | -                 | -              | -                | KL52                                 | OL101                                |
| ST38      | LH_F158  | -                 | -              | -                | KL52                                 | OL101                                |
| ST383     | HishK8   | -                 | iuc 1          | -                | unknown<br>(best<br>match =<br>KL30) | unknown<br>(best<br>match =<br>O1v2) |
|           | HishK9   | -                 | iuc 1          | -                | unknown<br>(best<br>match =<br>KL30) | O1/O2v1                              |
|           | LH_F15   | -                 | -              | -                | KL30                                 | O1/O2v2                              |
|           | LH_F35   | -                 | iuc 1          | rmp 1;<br>KpVP-1 | KL30                                 | O1v2                                 |
|           | LH_F190  | -                 | iuc 1          | rmp 1;<br>KpVP-1 | unknown<br>(best                     | O1v2                                 |

|       |         |                   |   |   |  |                                       |                                         |
|-------|---------|-------------------|---|---|--|---------------------------------------|-----------------------------------------|
|       |         |                   |   |   |  | match =                               |                                         |
|       |         |                   |   |   |  | KL30)                                 |                                         |
| ST39  | LH_F146 | ybt 4; plasmid    | - | - |  | KL149                                 | O2v2                                    |
| ST437 | K4      | ybt 9; ICEKp3     | - | - |  | KL36                                  | O4                                      |
|       | LH_R323 | ybt 9; ICEKp3     | - | - |  | KL36                                  | O4                                      |
|       | LH_F101 | ybt 9; ICEKp3     | - | - |  | KL36                                  | O4                                      |
|       | LH_F102 | ybt 9; ICEKp3     | - | - |  | KL36                                  | O4                                      |
|       | LH_F143 | ybt 9; ICEKp3     | - | - |  | KL36                                  | O4                                      |
|       | LH_F169 | ybt 9; ICEKp3     | - | - |  | KL36                                  | O4                                      |
|       | LH_F176 | ybt 9; ICEKp3     | - | - |  | KL36                                  | O4                                      |
| ST45  | LH_R313 | ybt 10;<br>ICEKp4 | - | - |  | KL62                                  | O2v1                                    |
| ST469 | LH_F126 | -                 | - | - |  | KL139                                 | O3b                                     |
| ST474 | LH_R384 | -                 | - | - |  | KL17                                  | O4                                      |
| ST501 | LH_F174 | -                 | - | - |  | KL10                                  | O3b                                     |
| ST514 | LH_R120 | -                 | - | - |  | KL35                                  | O1v1                                    |
| ST530 | HishK1  | ybt 10;<br>ICEKp4 | - | - |  | unknown<br>(best<br>match =<br>KL54)  | unknown<br>(best<br>match =<br>O1v2)    |
|       | HishK2  | ybt 10;<br>ICEKp4 | - | - |  | unknown<br>(best<br>match =<br>KL113) | unknown<br>(best<br>match =<br>O1/O2v1) |
| ST664 | LH_R100 | -                 | - | - |  | KL62                                  | O1v1                                    |
|       | LH_R107 | -                 | - | - |  | KL62                                  | O1v1                                    |
| ST882 | LH_R162 | ybt 4; plasmid    | - | - |  | KL16                                  | O1v1                                    |
|       | LH_F192 | ybt 4; plasmid    | - | - |  | KL16                                  | O1v1                                    |
| ST901 | LH_F159 | -                 | - | - |  | KL3                                   | O2v2                                    |
